# Supplementary material for: Sarcopenia Increases the Risk of Major Organ Invasion in Patients with Papillary Thyroid Cancer
Source: Research Square preprint supplement (doi:10.21203/rs.3.rs-900399/v1), 2021-09-21
Supplement: Supplementary file 1 [file 1cf72f4c7b7b1cc8a63f362b.docx]

**Supplementary Table 1. Unadjusted and adjusted logistic regression analyses between clinicopathologic features and high TNM stage**

|  | **Unadjusted** | | |  | **Adjusted** | | |
| --- | --- | --- | --- | --- | --- | --- | --- |
| OR | 95% CI | *p*-value |  | OR | 95% CI | *p*-value |
| Age | 1.157 | 1.032 - 1.299 | **0.013** |  | 1.148 | 1.018 - 1.294 | **0.024** |
| Male gender | 1.041 | 0.107 - 10.163 | 0.972 |  | - | - | - |
| Obesity | 0.769 | 0.079 - 7.494 | 0.821 |  | - | - | - |
| Sarcopenia | 12.208 | 1.142 - 130.552 | **0.038** |  | 6.099 | 0.478 - 77.874 | 0.164 |
| Tumor size | 0.996 | 0.890 - 1.114 | 0.941 |  | - | - | - |
| Tumor multiplicity | 0.503 | 0.052 - 4.891 | 0.554 |  | - | - | - |
| LN metastasis | 2.045 | 0.210 - 19.887 | 0.538 |  | - | - | - |

*OR,* odds ratio; *CI,* confidence interval; *LN,* lymph node.
